# Supplementary material
Source: PubMed Central journal article supplement (PMC2928864)

# Supplemental Figure 1

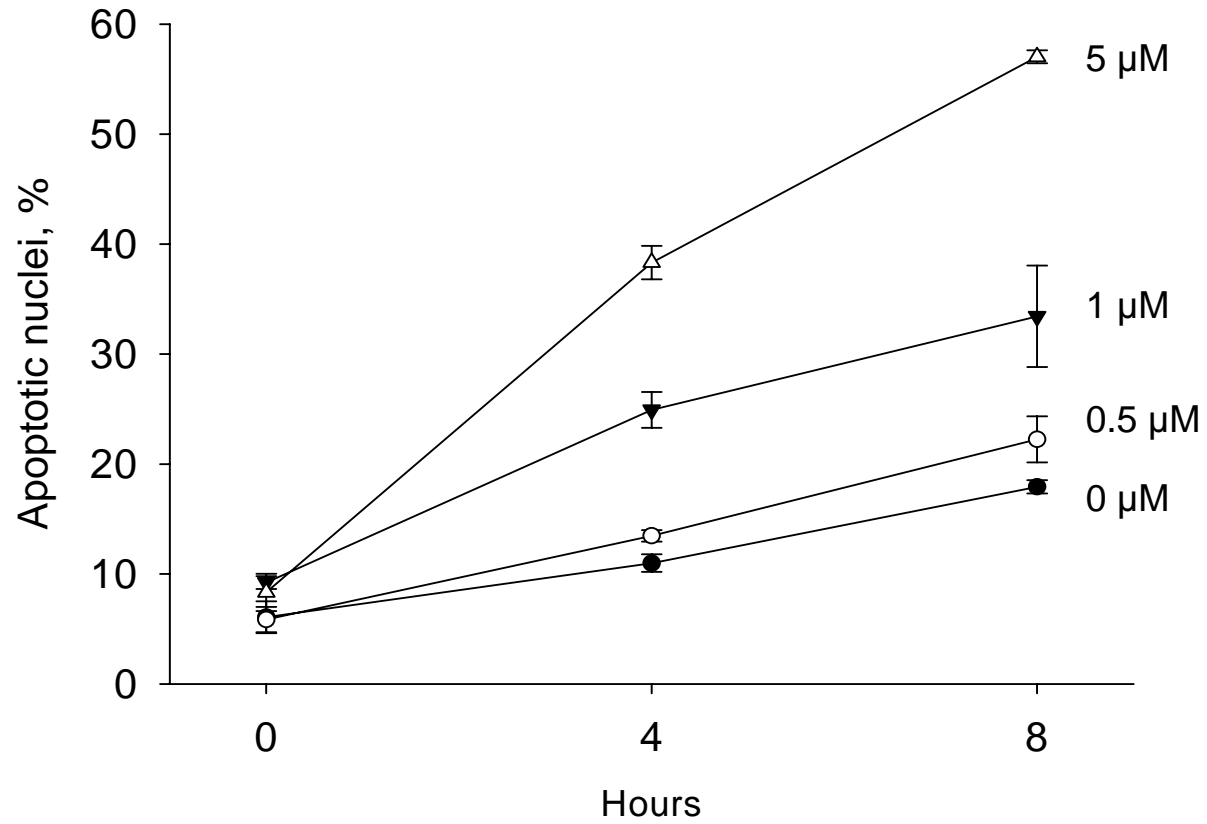

## Supplemental Figure 2

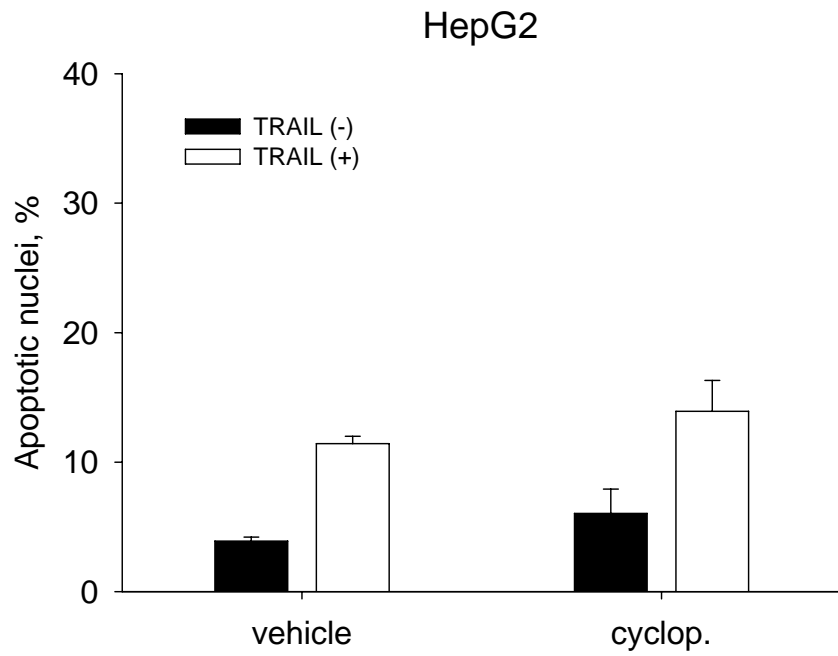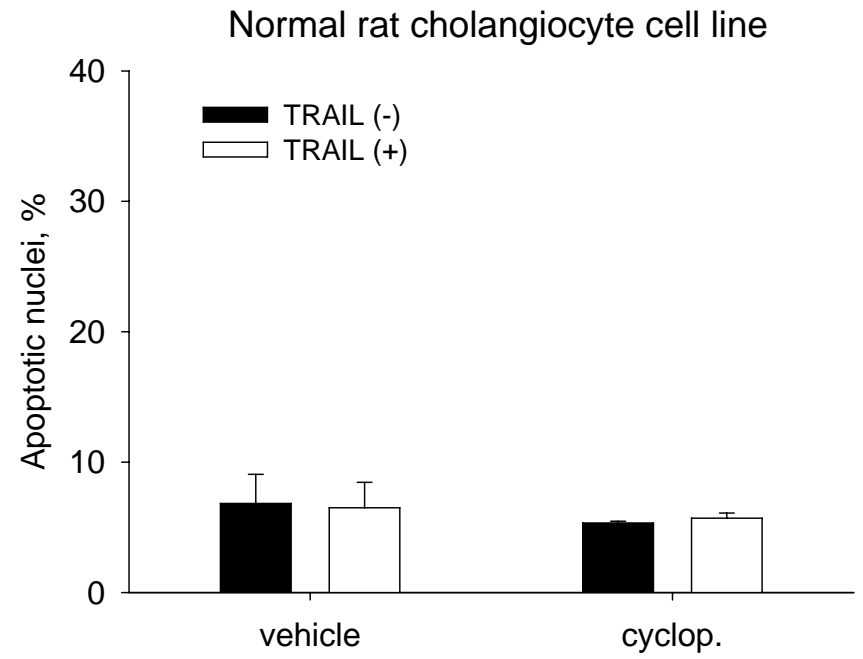



# Supplemental Figure 4

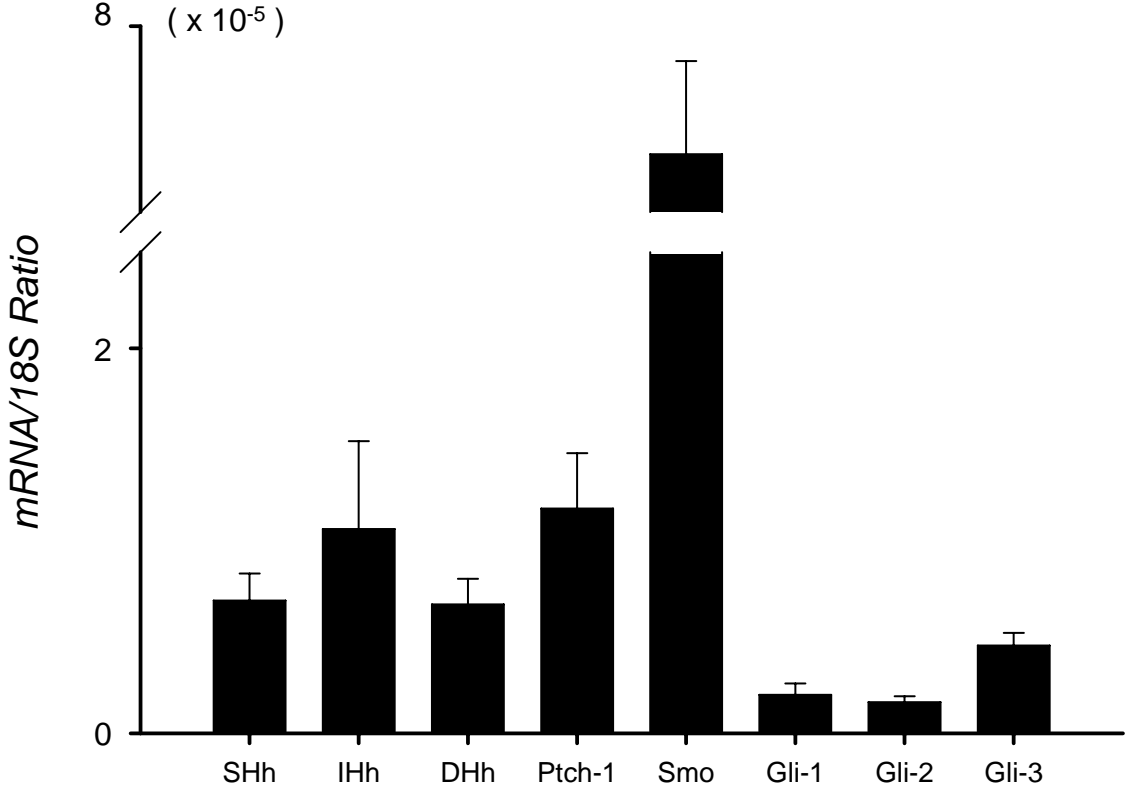

# Supplemental Figure 5

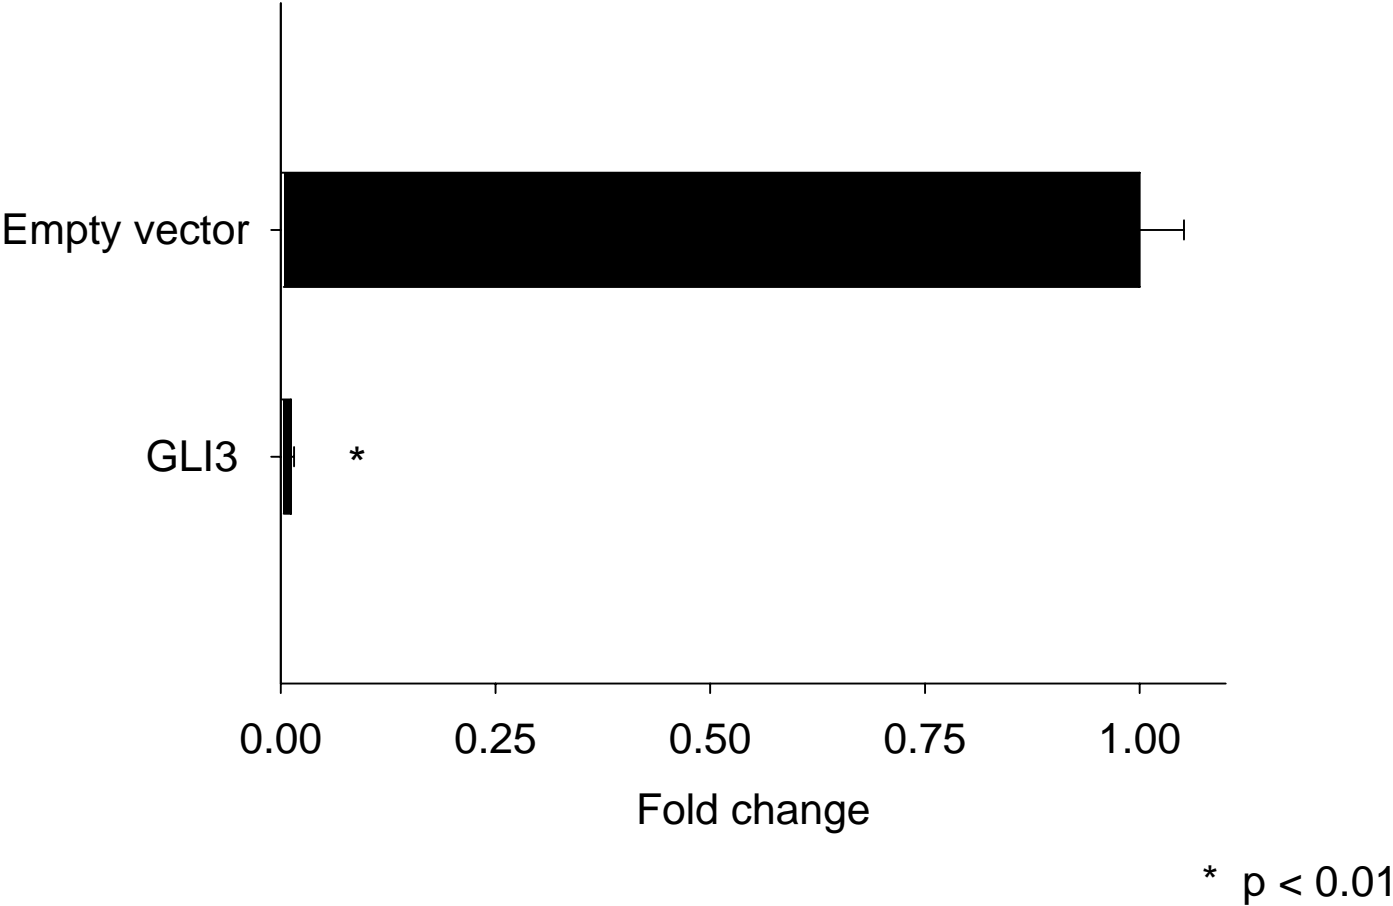

Supplement: NIHMS216797-supplement-2.pdf [file NIHMS216797-supplement-2.pdf]
